# Supplementary material
Source: bioRxiv or medRxiv preprint supplement (https://medrxiv.org/highwire/filestream/80136/field_highwire_adjunct_files/3/2020.05.06.20089573-4.pdf)

**Supplementary Figure 4.** These column charts demonstrate the number of case and control groups categorized the number of days from the onset of symptoms to (A) the first positive nasopharyngeal swab and (B) the first positive anal swab tests during the initial hospitalization.

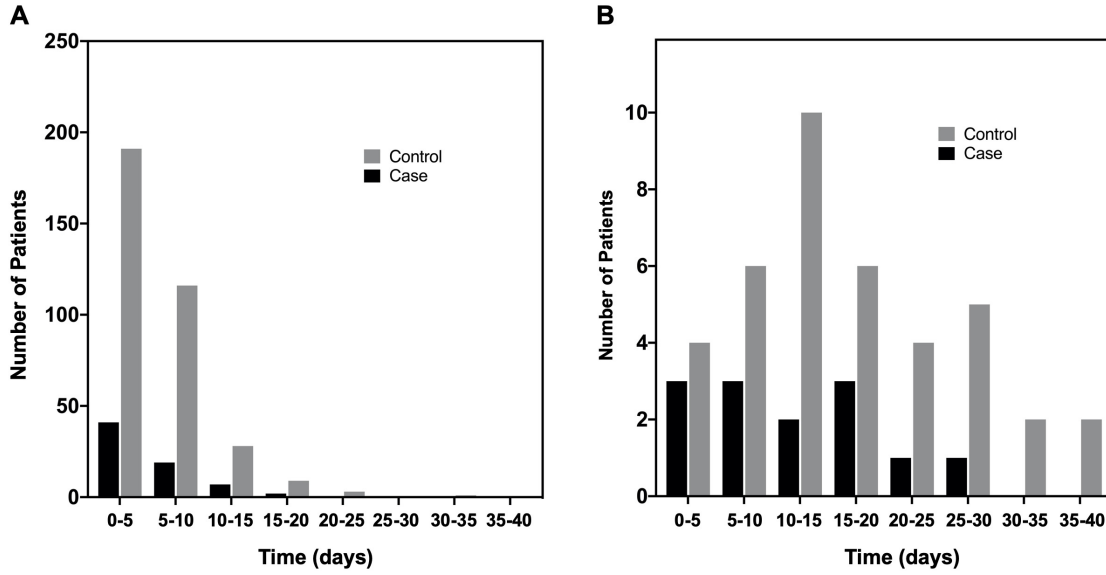

Supplement: Supplementary file [file 2020.05.06.20089573-4.pdf]
